# Supplementary material
Source: PubMed Central journal article supplement (PMC3123053)
Supplement: supp_M111.232926_jbc.M111.232926-2.pdf [file supp_M111.232926_jbc.M111.232926-2.pdf]

| Meas. m/z | Calc. m/z | Delta (Da) | Delta (ppm) | Rel. Int. (%) | Annotation                                           | Formula           |
|-----------|-----------|------------|-------------|---------------|------------------------------------------------------|-------------------|
| 1547.6906 | 1547.6438 | 0.0467     | 30.2        | 8.24          | [b14][1-14].GRASCKKCESEIPK.d [1xArsenicBinding]      | AsC60H103N20O19S2 |
| 1590.8248 | 1590.7727 | 0.0521     | 32.8        | 53.29         | [b15][1-15].GRASCKKCESEIPK.k                         | C64H111N21O22S2   |
| 1594.49   | 1594.5706 | -0.0806    | -50.5       | 7.22          | [y-NH3-11][19-29] p.HWYHFSCFWKV. [1xArsenicBinding]  | AsC78H88N17O14S   |
| 1636.8436 | 1636.7518 | 0.0918     | 56.1        | 13.83         | [y12][18-29] v.PHWYHFSCFWKV.                         | C83H101N19O15S    |
| 1644.7253 | 1644.6602 | 0.0651     | 39.6        | 7.11          | [b-H2O-15][1-15].GRASCKKCESEIPK.k [1xArsenicBinding] | AsC64H106N21O21S2 |
| 1645.7014 | 1645.6442 | 0.0572     | 34.8        | 10.19         | [b-NH3-15][1-15].GRASCKKCESEIPK.k [1xArsenicBinding] | AsC64H105N20O22S2 |
| 1662.7295 | 1662.6708 | 0.0587     | 35.3        | 100           | [b15][1-15].GRASCKKCESEIPK.k [1xArsenicBinding]      | AsC64H108N21O22S2 |
| 1708.634  | 1708.6499 | -0.0159    | -9.3        | 6.16          | [y12][18-29] v.PHWYHFSCFWKV. [1xArsenicBinding]      | AsC83H98N19O15S   |
| 1789.8946 | 1789.9411 | -0.0466    | -26         | 6.12          | [a17][1-17].GRASCKKCESEIPKDKV.p                      | C74H132N24O23S2   |
| 1861.8605 | 1861.8393 | 0.0212     | 11.4        | 6.12          | [a17][1-17].GRASCKKCESEIPKDKV.p [1xArsenicBinding]   | AsC74H129N24O23S2 |
| 1863.9980 | 1863.9152 | 0.0828     | 44.4        | 17.01         | [y14][16-29] d.KVPHWYHFSCFWKV.                       | C94H122N22O17S    |
| 1889.8873 | 1889.8342 | 0.0531     | 28.1        | 7.81          | [b17][1-17].GRASCKKCESEIPKDKV.p [1xArsenicBinding]   | AsC75H129N24O24S2 |
| 1935.8337 | 1935.8133 | 0.0204     | 10.5        | 9.51          | [y14][16-29] d.KVPHWYHFSCFWKV. [1xArsenicBinding]    | AsC94H119N22O17S  |
| 2404.21   | 2404.2059 | 0.004      | 1.7         | 5.56          | [y19][11-29] e.SIPKDKVPHWYHFSCFWKV.                  | C118H162N28O25S   |
| 2755.4611 | 2755.3232 | 0.1379     | 50.1        | 5.23          | [b-NH3-24][1-24].GRASCKKCESEIPKDKVPHWYHFS.c          | C124H183N35O33S2  |
| 3378.6471 | 3378.6485 | -0.0015    | -0.4        | 5.78          | [y-H2O-28][2-29] g.RASCKKCESEIPKDKVPHWYHFSCFWKV.     | C156H228N42O37S3  |

**Supplemental Table 2. Summary of fragment ions produced by AsPARPzf.** The calculated (Calc.) and measured (Meas.) m/z, differences (Delta (Da/ppm)), relative intensity (Rel. Int.), sequences and formulas relating to Figure 2.
